## RESEARCH ARTICLE

# High-intensity focused ultrasound ablation combined with immunotherapy for treating liver metastases: A prospective non-randomized trial

Xiyue Yang<sup>1,2,3</sup>, Yao Liao<sup>2,3</sup>, Lingli Fan<sup>1,2,3</sup>, Binwei Lin<sup>1,2,3</sup>, Jie Li<sup>1,3</sup>, Danfeng Wu<sup>1,3</sup>, Dongbiao Liao<sup>1,3</sup>, Li Yuan<sup>1,3</sup>, Jihui Liu<sup>1,3</sup>, Feng Gao<sup>1,2,3,4</sup>, Gang Feng<sup>1,3</sup>, Xiaobo Du<sup>1,2,3,4\*</sup>

**1** Department of Oncology, Mianyang Central Hospital, Mianyang, China, **2** State Key Laboratory of Ultrasound in Medicine and Engineering, College of Biomedical Engineering, Chongqing Medical University, Chongqing, China, **3** Sichuan Clinical Research Center for Radiation and Therapy, Mianyang, China, **4** Chongqing Key Laboratory of Biomedical Engineering, Chongqing Medical University, Chongqing, China

✉ These authors contributed equally to this work.

\* [duxiaobo2005@126.com](mailto:duxiaobo2005@126.com)

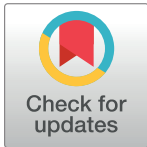

## OPEN ACCESS

**Citation:** Yang X, Liao Y, Fan L, Lin B, Li J, Wu D, et al. (2024) High-intensity focused ultrasound ablation combined with immunotherapy for treating liver metastases: A prospective non-randomized trial. PLoS ONE 19(7): e0306595. <https://doi.org/10.1371/journal.pone.0306595>

**Editor:** Niraj Babu, UT Austin: The University of Texas at Austin, UNITED STATES

**Received:** January 27, 2024

**Accepted:** June 18, 2024

**Published:** July 5, 2024

**Copyright:** © 2024 Yang et al. This is an open access article distributed under the terms of the [Creative Commons Attribution License](https://creativecommons.org/licenses/by/4.0/), which permits unrestricted use, distribution, and reproduction in any medium, provided the original author and source are credited.

**Data Availability Statement:** All relevant data are within the manuscript and its [Supporting information](#) files.

**Funding:** This work was financially supported by the State Key Laboratory of Ultrasound in Medicine and Engineering (2020KFKT016 and 2022KFKT011) The funders had no role in study design, data collection and analysis, decision to publish, or preparation of the manuscript.

**Competing interests:** The authors have declared that no competing interests exist.

## Abstract

### Purpose

Given the unique features of the liver, it is necessary to combine immunotherapy with other therapies to improve its efficacy in patients of advanced cancer with liver metastases (LM). High-intensity focused ultrasound (HIFU) ablation is now widely used in clinical practice and can enhanced immune benefits. The study is intended to prospectively evaluate the safety and clinical feasibility of HIFU ablation in combination with systemic immunotherapy for patients with liver metastases.

### Methods

The study enrolled 14 patients with LM who received ultrasound-guided HIFU ablation combined with immune checkpoint inhibitors (ICIs) such as anti-programmed cell death protein 1 (anti-PD-1 agents manufactured in China) at Mianyang Central Hospital. Patients were followed up for adverse events (AEs) during the trial, using the Common Terminology Criteria for Adverse Events v5.0 (CTCAE v5.0) as the standard. Tumour response after treatment was assessed using computerized tomography.

### Results

The 14 patients (age range, 35–84 years) underwent HIFU ablation at 19 metastatic sites and systemic immunotherapy. The mean lesion volume was 179.9 cm<sup>3</sup> (maximum: 733.1 cm<sup>3</sup>). Median follow-up for this trial was 9 months (range: 3–21) months. The study is clinically feasible and acceptable to patients.

## Conclusion

This prospective study confirmed that HIFU combined with immunotherapy is clinically feasible and safe for treating liver metastases.

## 1. Introduction

Cancer metastases are the causes of over 90% of mortalities associated with advanced solid tumor [1, 2]. The liver has rich hemodynamic features (both portal venous and arterial systems) and unique microenvironment which render it intrinsically susceptible to disseminated tumor cells, resulting in a metastasis rate of 11.1%, one of the most common targets for metastasis [3, 4]. The incidence of primary malignancies and liver metastases (LM) has increased in recent years [5]. Approximately 40% of patients with malignant tumors develop LM [6], which greatly impacts patient survival [4]. Treatment involves two aspects: primary tumors and LM [7, 8]. If these cannot be radically resected by surgery, it is difficult to control the progression of advanced cancer in the long term, even with the wide range of current treatment options [9]. Therefore, effective and less toxic combination therapies need to be actively explored for patients with liver metastases, especially those after multiple lines of treatment.

The advent of immunotherapy has achieved great success in clinical practice and has gradually moved from being a popular new treatment to a first-line recommendation in guidelines for many cancers [10–14]. To date, the US FDA has approved various immunotherapeutic agents, of which the most widely used in clinical is anti-PD1-PDL1 [11, 15–18]. They have been routinely used in the treatment of common malignancies owing to their favorable toxicity profile, clinical benefit, and patients' quality of life [19, 20]. However, the presence of liver metastases in patients with advanced cancer will lead to a lack of response to immunotherapy, an immunosuppressive effect that has been demonstrated in several studies by modulating and activating systemic and intra-tumoural immune cells [21]. In addition, macrophage-induced apoptosis eliminates tumor-specific CD8+ T cells, thereby promoting hepatic immunotolerance [22]. As such, although some studies have shown that ICI-based immunotherapy improves overall survival in patients with advanced cancer, patients with liver metastases achieve less overall benefit [23]. Therefore, it is necessary to combine immunotherapy with other therapies to achieve synergistic effects by reversing the immunosuppressive tumor microenvironment [24–27].

ICI-based immunotherapy in conjunction with cytotoxic chemotherapy have been widely used as the standard clinical treatment [28]. Clinical trial data (Impower150) has suggested that chemotherapy may enhance the efficacy of ICIs in LM patients to some extent [29]. The local effect of radiotherapy in metastatic cancer can stimulate systemic immunity, and radiotherapy combined with immunotherapy is more common in clinical practice [30].

For example, radiotherapy enhanced the systemic effect of immunotherapy, leading to the regression of distant metastatic cancer [31]. Minimally ablative therapies have also shown immunomodulatory effects in patients with LM [32–36], mobilizing systemic immune cells for an anti-tumour immune response by exposing tumour-associated antigens [37]. High-intensity focused ultrasound ablation was originally applied to gynecological benign tumors such as uterine fibroids, and is now widely used in the treatment of advanced and metastatic malignancies because it is a safe, non-interventional therapy [38, 39]. HIFU can accurately treat targeted lesions and produce thermal effects (T-HIFU) that induced coagulative necrosis of the tumour or mechanical effects (M-HIFU) that destroyed the tumour and thus enhanced

tumour antigenicity [37, 38, 40–42]. The local therapeutic effects of HIFU ablation in patients have also been demonstrated in a number of study [43–48]. Moreover, extensive clinical and preclinical studies have shown that HIFU thermal ablation induces long-term systemic anti-tumour immunity in the host, in addition to direct tumor destruction [31–36, 49]. Thus, HIFU may enhance the efficacy of immunotherapy in clinical practice.

To date, only two ongoing clinical trials have combined HIFU with anti-PD-1 immunotherapy. Trial registration numbers are: (NCT03237572), (NCT04116320), respectively: HIFU combined with immunotherapy in the treatment of metastatic breast cancer; Focused ultrasound ablation (FUSA) combined with pembrolizumab for solid tumors [50]. To our knowledge, no studies have been conducted combining anti-PD-1 immunotherapy with HIFU ablation for the treatment of liver metastases. Therefore, this study explored the safety and workflow feasibility of combining the two treatments for patients with liver metastases.

## 2. Materials and methods

The study registration date (registration number: ChiCTR2100043123) is available at the Chinese Clinical Trials Registry (date of registration 05/02/2021). Where applicable to the study design, the Transparent Reporting of Evaluations with Non-randomized Designs (TREND) reporting guidelines were followed.

### 2.1. Ethics statement

This study was approved by the Ethics Committee of Mianyang Central Hospital, Sichuan, China (approval number: S-2020-054) and was conducted according to the tenets of the Declaration of Helsinki. Prior to the intervention, the investigator should discuss the associated risks and specific treatment with each patient and the informed written consent form should be formally signed by the subject party.

### 2.2. Safety assessments and efficacy

The primary endpoint is the safety and feasibility of the combination of the two treatments. Adverse events (AEs), such as pain scores and calculated nonperfusion volume (NPV) ratios, were recorded. NPV% is generally used to represent the volume of ablation, which can evaluate the therapeutic effect of HIFU. Secondary endpoints are tumour response and progression, with follow-up review and recording of different rates of tumour size, such as disease control rate (DCR), objective response rate (ORR). All target lesions (including measurable primary lesions, hepatic metastases, and remaining metastatic site lesions) were measured by computed tomography (CT) imaging and initial baseline conditions were recorded, and efficacy was assessed thereafter every two cycles of immunotherapy. Tumour response was assessed against the Response Evaluation Criteria in Solid Tumours (RECIST) version 1.1 compared to baseline. Patients were followed up for adverse events (AEs) during the trial, using the Common Terminology for Adverse Events version 5.0 as the standard.

### 2.3. Patient characteristics

From February 25, 2021 to March 11, 2022, 14 patients with LM who received HIFU treatment combined with immunotherapy at Mianyang Central Hospital were selected for this study. Patients had previously received standard treatment for primary tumors, but after multiple anti-tumor interventions, including targeted therapy, chemotherapy, radiotherapy, and surgery, the patients developed advanced cancers with extensive systemic metastases. All patients were eligible for reoperation, could tolerate systemic chemotherapy, and could undergo

multiple radiotherapy sessions at the same site. Eligible patients volunteered to participate in this study after being informed that systemic immunotherapy in combination with HIFU therapy has relatively few toxic side effects and that HIFU therapy can be repeated multiple times. Immunotherapy was administered within 1 month before and after HIFU ablation to be considered a combination of the two treatments. While there are clinical trials investigating the use of HIFU for immunomodulation of malignant tumors, none have specifically examined the combination of HIFU with immunotherapy [50]. Based on relevant preclinical research, the timing of immunotherapy and HIFU treatment is not rigidly defined [52–54]. The initial design and inclusion criteria of our trial aimed to integrate immunotherapy during the period of HIFU treatment (within 1 month before and after HIFU). Given the absence of literature comparing the efficacy and side effects of different immunological drugs in patients with liver metastases, we refrained from selecting a specific immune checkpoint inhibitor.

Inclusion criteria of patients were: aged 18–75 years; ECOG (Eastern Cooperative Oncology Group) performance status scored 0–2 points; the presence of liver metastases confirmed by diagnostic imaging or by needle biopsy; with no contraindications to immunotherapy and those aware of the associated side effects; with a strong desire for treatment, who understood and agreed to the HIFU treatment and the possible risks (including caregivers); agreement to use immunotherapy in combination during HIFU treatment (within 1 month before and after); who were aware of the range of lesions treatable and safety of HIFU technology; with measurable target lesion assessed by RECIST 1.1; survived at least 12 weeks; with normal function of vital organs.

Exclusion criteria are: patients with uncontrolled hypertension or hyperglycaemia or a history of severe unnormal function of vital organs; who were pregnant or lactating; patients with significant scarring of the abdominal wall of the acoustic pathway; who have received prior radiotherapy doses >45 Gy at the same site as the HIFU treatment; with acute abdomen inflammatory disease; with tumors not visible using our monitoring system; with clearly diagnosed hepatic failure (e.g. hepatic encephalopathy or significant ascites); with abnormal coagulation and therapies such as thrombolysis or anticoagulation within 4 weeks of initiating intervention.

## 2.4. Pre-HIFU preparation

All patients undergo specific bowel preparation prior to HIFU ablation by feeding dregs-free liquid diet for 2–3 days, fasting for 10 hours prior to procedure and having an enema the morning before the procedure. Cleansing of the skin around the target lesion to achieve degreasing and degassing is a routine topical skin preparation prior to HIFU treatment. All patients provided samples for immunoassay, thyroid function, adrenocortical hormone, and cardiac marker analyses before initiating immunotherapy. HIFU ablation used model-jc-focused ultrasound tumour treatment system, manufactured by Chongqing HIFU Medical Technology Co Ltd, China. During HIFU treatment, as with all general anaesthetic procedures, a specialist anesthetist is required to ensure that the treatment is carried out under intravenous sedation and analgesia to prevent pain and discomfort, as well as to monitor the patient's vital signs.

## 2.5. Follow-up

All patients were transferred to ICU, after HIFU treatment, and returned to their original wards from day 2 onwards. For the first 3 days post-treatment, follow-ups to assess the incidence of pain flares and any complications were performed daily. For the first month post-treatment daily, telephone follow-ups were conducted to measure any patient discomfort from

day 4. The patients returned to the hospital for follow-up every two months post-treatment for imaging and symptom evaluation.

All AEs were recorded independently of their relationship with the treated metastasis. AEs were classified as absolutely unrelated, probably unrelated, possibly related, probably related or absolutely related according to their relevance to treatment and all AEs were scored by a specialist clinician. The stopping rule will be triggered if three patients develop severe treatment-related AEs, according to the International Organization for Standardization Criteria. Pain and discomfort were measured using the Visual Analogue Scale (VAS), which is self-reported pain assessment tool that uses 10-point scale, with 0 being pain-free gradually increasing to 10 being most painful.

## 2.6 Statistical methods

SPSS 22.0 statistical software was used to analyze the data collected by the cutoff date of March 11, 2022. The objective response rate (ORR) was calculated using the Clopper-Pearson method.

## 3. Results

### 3.1. Patient population

Fourteen patients were included in the study, five men and nine women, with a median age of 63 years (range: 35–84 years) (Fig 1). Median follow-up period was 9 months (range: 3–21). No patients were lost to follow-up throughout the trial period. Table 1 described the clinical characteristics of the study population. Immunotherapy was performed within 1 month before and after HIFU ablation. All patients chose combination immunotherapy, and the immunotherapies selected for this trial are all anti-PD-1 agents manufactured in China. Most of the immunotherapy was prior to HIFU ablation, and only 3 patients added immunotherapy after HIFU ablation. Sintilimab Injection was chosen in 6 cases, Toripalimab Injection in 2 cases, Camrelizumab for Injection in 2 cases, and Tislelizumab Injection in 4 cases. Fig 2 illustrates the specific time of immunotherapy.

Table 2 demonstrates the supplementary clinical features of patients with LM. The mean body mass index was 23 (range: 15–28). The mean lesion volume was 179.9 cm<sup>3</sup>, with a maximum volume of 733.1 cm<sup>3</sup>. The clinical symptoms at baseline included abdominal pain in 7 patients (50.0%), abdominal distention in 3 patients (21.4%), and asymptomatic in 4 patients

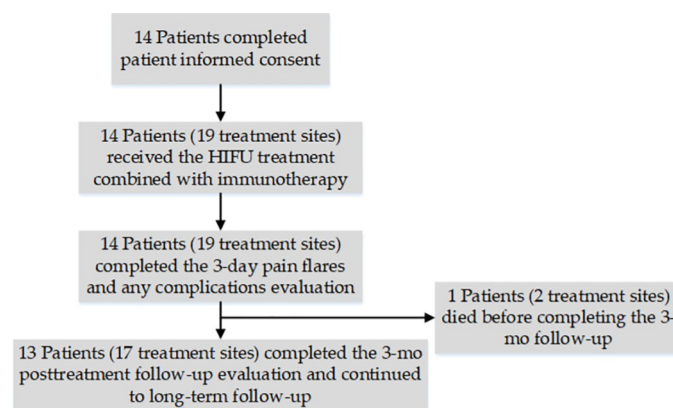

**Fig 1. Consort participant flow diagram.**

<https://doi.org/10.1371/journal.pone.0306595.g001>

**Table 1. Patients' characteristics and baseline demographics.**

| Characteristics and demographics | No. (%)    |
|----------------------------------|------------|
| <b>Patient demographics</b>      |            |
| Total No.                        | 14         |
| <b>Age</b>                       |            |
| Median age(year)                 | 63 (35–84) |
| >63                              | 7 (50.0)   |
| ≤58                              | 7 (50.0)   |
| <b>Sex</b>                       |            |
| Male                             | 5 (35.7)   |
| Female                           | 9 (64.3)   |
| <b>ECOG Score</b>                |            |
| 0–1 point                        | 8 (57.1)   |
| 2 points                         | 6 (42.9)   |
| <b>Clinical characteristics</b>  |            |
| Histologic diagnosis, No.        | 14         |
| Lung cancer                      | 3 (21.4)   |
| Esophageal cancer                | 2 (14.3)   |
| Hepatocellular carcinoma         | 2 (14.3)   |
| Cholangiocarcinoma               | 2 (14.3)   |
| Cervical cancer                  | 1 (7.1)    |
| Pancreatic cancer                | 1 (7.1)    |
| Nasopharyngeal carcinoma         | 1 (7.1)    |
| Gallbladder cancer               | 1 (7.1)    |
| Sigmoid colon cancer             | 1 (7.1)    |
| <b>No. of treated lesions</b>    |            |
| 1                                | 10 (71.4)  |
| 2                                | 3 (21.4)   |
| 3                                | 1 (7.1)    |

<https://doi.org/10.1371/journal.pone.0306595.t001>

(28.6%). With reference to pre-HIFU and post-HIFU QOL quality of life (QOL) scores, there was no reduction in patients' quality of life after HIFU. A total of seven patients were still alive after 12 months of follow-up. (Table 2).

Among the 14 patients, there were a total of 19 distinct treatment sites: 10 patients received treatment at 1, 3 patients received treatment at 2, and 1 patient received treatment at 3 anatomical sites. All metastases are within the range of lesions treatable with HIFU ablation and have safe acoustic access. Treatment begins at the lowermost part of the target lesion, with 1 cm as the treatment unit. During the procedure, the patient's vital signs and changes in the ultrasound image of the lesion are closely observed and the power and direction are adjusted in time. All patients chose to receive combined immunotherapy (the type of anti-PD1 was not defined).

### 3.2. HIFU treatment workflow feasibility

Subjects complete at least two cycles for HIFU ablation combined with immunotherapy, and gray changes grayscale gray were observed in the target lesions after HIFU ablation (Fig 3). The workflow for HIFU ablation of liver metastases were shown in Table 3. HIFU, as a non-invasive treatment method, uses the thermal, cavitation and mechanical effects of ultrasound

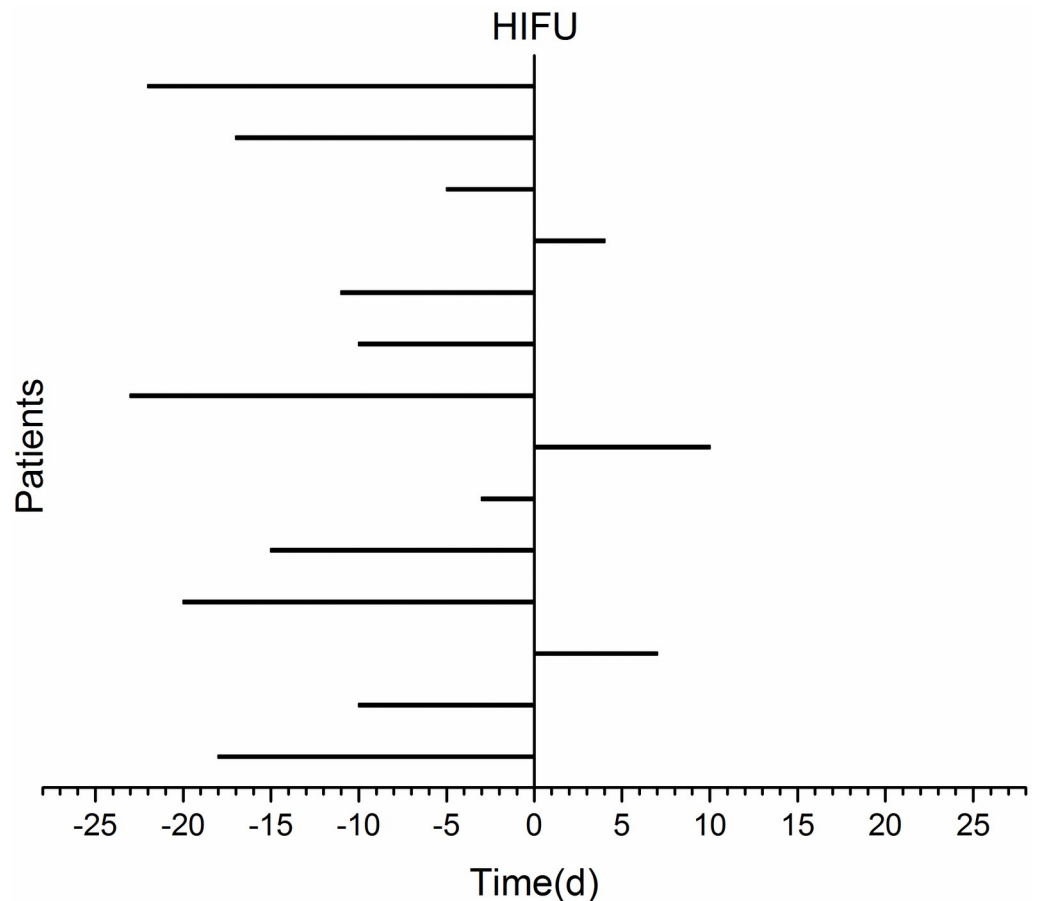

**Fig 2. Specific time of immunotherapy.**

<https://doi.org/10.1371/journal.pone.0306595.g002>

to achieve coagulative necrosis of tumours. After HIFU and also at the time of the first efficacy assessment (after 2 cycles of immunotherapy), CT examination showed that non-perfused areas were observed in all the 19 treated lesions. And the average NPV ratio was 77% (range: 58–88%), which can be assessed as a relatively satisfactory ablation. There were no equipment-related problems or delays in treatment with the HIFU treatment.

### 3.3 Adverse events

A total of 21 adverse events in 14 patients were considered "probably" or "definitely related" to HIFU combined with immunotherapy. Most AEs (11 out of 21) were related to pain in the treatment area, with three of these reported as Grade 2 pain (Table 4), with no significant AEs identified. Other recorded AEs consisted of 4 cases of fatigue (28.6%), 3 cases showed rash (21.4%), and 1 case showed long-term skin discoloration (Grade 1). Most AEs were found to be reversible. There were an absence of treatment-related deaths or treatment-related grade 4 adverse reactions in this study.

As shown in Table 5, HIFU relieved the patients' pain, with five of the seven patients with abdominal pain receiving pain relief after HIFU treatment, although one of them had increased pain (case 10). Pain scores increased slightly between 3 and 12 months after HIFU. Two patients did not complain of pain through follow-up period.

Table 2. Supplementary baseline for clinical characteristics of patients with liver metastases.

| Case | Age | BMI  | Primary tumor            | histologic subtypes                                      | Tumor volume (cm <sup>3</sup> ) | Symptoms before HIFU | Pre-HIFU QOL score | Post-HIFU QOL scores | Status    |
|------|-----|------|--------------------------|----------------------------------------------------------|---------------------------------|----------------------|--------------------|----------------------|-----------|
| 1    | 35  | 15   | Cervical cancer          | Adenosquamous carcinoma                                  | 393.3                           | Abdominal distention | 70                 | 70                   | Deceased  |
| 2    | 55  | 27.6 | Lung cancer              | Poorly differentiated adenocarcinoma                     | 26.3                            | Asymptomatic         | 90                 | 90                   | Surviving |
| 3    | 46  | 25.1 | Pancreatic cancer        | Poorly differentiated adenocarcinoma                     | 44.5                            | Abdominal pain       | 90                 | 90                   | Deceased  |
| 4    | 74  | 21.5 | Esophageal cancer        | Poorly differentiated squamous cell carcinoma            | 58.5                            | Asymptomatic         | 80                 | 90                   | Deceased  |
| 5    | 54  | 20.4 | Nasopharyngeal carcinoma | Moderately-poorly differentiated squamous cell carcinoma | 117.7                           | Abdominal pain       | 90                 | 90                   | Deceased  |
| 6    | 58  | 20.4 | Cholangiocarcinoma       | Poorly differentiated adenocarcinoma                     | 136.4                           | Abdominal pain       | 90                 | 90                   | Deceased  |
| 7    | 37  | 24.2 | Gallbladder cancer       | Poorly differentiated adenocarcinoma                     | 733.1                           | Abdominal pain       | 80                 | 80                   | Deceased  |
| 8    | 73  | 22.5 | Esophageal cancer        | Moderately differentiated squamous cell carcinoma        | 4.5                             | Abdominal pain       | 80                 | 80                   | Surviving |
| 9    | 75  | 27.6 | Lung cancer              | Moderately-poorly differentiated squamous cell carcinoma | 294.9                           | Abdominal pain       | 80                 | 80                   | Surviving |
| 10   | 56  | 24.3 | Cholangiocarcinoma       | Poorly differentiated adenocarcinoma                     | 12.2                            | Abdominal pain       | 90                 | 90                   | Surviving |
| 11   | 69  | 23.0 | Lung cancer              | Moderately differentiated squamous cell carcinoma        | 16.2                            | Asymptomatic         | 90                 | 90                   | Surviving |
| 12   | 68  | 22.8 | Sigmoid colon cancer     | Moderately differentiated adenocarcinoma                 | 259.0                           | Abdominal distention | 90                 | 90                   | Deceased  |
| 13   | 69  | 24.0 | Hepatocellular carcinoma | Hepatocellular                                           | 57.0                            | Asymptomatic         | 90                 | 90                   | Surviving |
| 14   | 84  | 22.9 | Hepatocellular carcinoma | Hepatocellular                                           | 364.8                           | Abdominal distention | 80                 | 90                   | Surviving |

<https://doi.org/10.1371/journal.pone.0306595.t002>

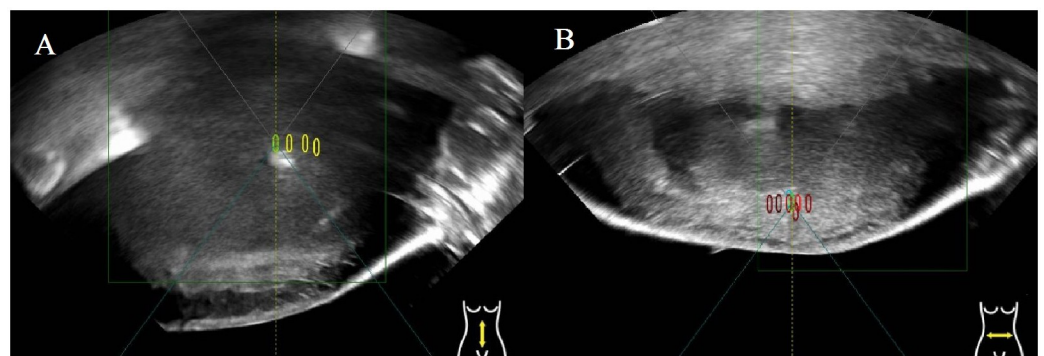

**Fig 3. The real-time ultrasound image obtained from two patients with liver metastases.** (A) shows the overall grayscale change: the gradient grayscale increases; (B) shows the Massive grayscale change: the area around the focal point quickly and noticeably grays and brightens grayscale. We categorized grayscale changes into two types: overall grayscale changes and massive grayscale changes [1]. Overall grayscale change refers to a gradual increase in grayscale around the focal point, while massive grayscale change indicates an immediate and significant diffuse increase in grayscale in the focal area. However, there is no standard for grayscale changes in HIFU treatment for malignant tumors. Clinically, grayscale changes for malignant tumors are typically assessed based on the standard of grayscale changes in HIFU treatment for uterine fibroids.

<https://doi.org/10.1371/journal.pone.0306595.g003>



Table 3. Workflow for HIFU treatment of liver metastases.

| Case | No. of treated lesions | Average power (w) | Treatment Time (min) | Sonication time (s) | Treatment time intensity (s/h) | Therapeutic Dose (J) | NPV ration | Gray scale change         |
|------|------------------------|-------------------|----------------------|---------------------|--------------------------------|----------------------|------------|---------------------------|
| 1    | 1                      | 400               | 240                  | 2999                | 749.8                          | 1199600              | 88         | Massive grayscale changes |
| 2    | 1                      | 300               | 90                   | 421                 | 280.7                          | 12000                | 64         | Overall grayscale change  |
| 3    | 2                      | 380               | 160                  | 1199                | 449.6                          | 467800               | 72         | Massive grayscale changes |
| 4    | 3                      | 350               | 100                  | 740                 | 444                            | 283800               | 58         | Overall grayscale change  |
| 5    | 1                      | 350               | 90                   | 606                 | 404                            | 240000               | 76         | Overall grayscale change  |
| 6    | 1                      | 398               | 65                   | 600                 | 553.9                          | 238800               | 86         | Overall grayscale change  |
| 7    | 2                      | 363               | 250                  | 1986                | 476.6                          | 726350               | 68         | Massive grayscale changes |
| 8    | 1                      | 250               | 120                  | 781                 | 390.5                          | 195250               | 80         | Massive grayscale changes |
| 9    | 1                      | 400               | 290                  | 2605                | 538.9                          | 1042000              | 88         | Overall grayscale change  |
| 10   | 1                      | 399               | 150                  | 1017                | 406.8                          | 405300               | 80         | Overall grayscale change  |
| 11   | 1                      | 363               | 160                  | 1157                | 433.9                          | 420050               | 74         | Overall grayscale change  |
| 12   | 2                      | 390               | 195                  | 3600                | 1107.7                         | 727100               | 76         | Massive grayscale changes |
| 13   | 1                      | 343               | 285                  | 1680                | 353.7                          | 890950               | 80         | Overall grayscale change  |
| 14   | 1                      | 344               | 210                  | 3000                | 857.1                          | 571950               | 86         | Massive grayscale changes |

<https://doi.org/10.1371/journal.pone.0306595.t003>

### 3.4. Efficacy

Before the cutoff date, no patients in the trial had achieved complete response (CR) and three patients (21.4%) showed disease progression after 2 cycles of combined therapy. However, eight patients (57.2%) achieved stable disease (SD) and three patients (21.4%) achieved partial response (PR). The objective response rate (ORR) and disease control rate (DCR) were 21.4% and 78.6%, respectively (Table 6). For these 14 patients who had at least one post-baseline efficacy assessment, a waterfall plot of the optimal percentage change in all target lesions was plotted (Fig 4).

## 4. Discussion

In this study, we investigated a novel combination therapy, systemic ICI-based immunotherapy, combined with local HIFU ablation in 14 patients with advanced LM. Notably, five patients experienced post-intervention pain relief, indicating the safety and clinical feasibility of combining the two treatments for LM.

Given the unique anatomy of the liver, which contributes to the expansion of local metastases and poor effectiveness to immunotherapy in LM patients, the combination of HIFU treatment and immunotherapy may achieve complementary results [51]. Moreover, HIFU ablation has shown to have immunomodulatory effects and can produce distinctive tumour fragments,

**Table 4. Adverse events (definitely, possibly, or probably) associated with HIFU treatment and immunotherapy (n = 14).**

| Adverse events                                                  | Patient, No. (%) |
|-----------------------------------------------------------------|------------------|
| <b>Acute events (<math>\leq 3</math> mo post-treatment)</b>     |                  |
| Skin burn                                                       | none (0)         |
| Surrounding structure injury                                    | none (0)         |
| Intestinal injury                                               | none (0)         |
| Pain in treatment area                                          |                  |
| grade 1                                                         | 8 (57.1)         |
| grade 2                                                         | 3 (21.4)         |
| grade 3                                                         | none (0)         |
| grade 4                                                         | none (0)         |
| Nerve injury                                                    | none (0)         |
| Fatigue (grade 1)                                               | 4 (28.6)         |
| Myocarditis                                                     | none (0)         |
| Rash (grade 1)                                                  | 3 (21.4)         |
| Pneumonitis                                                     | none (0)         |
| <b>Long term events (<math>&gt; 3</math> mo post-treatment)</b> |                  |
| Skin discoloration (grade 1)                                    | 1 (7.1)          |
| Endocrine dysfunctions                                          | none (0)         |
| Liver dysfunction/failure (clinical)                            | none (0)         |

<https://doi.org/10.1371/journal.pone.0306595.t004>

inducing local inflammation with significant dendritic cell infiltration and enhancing dendritic cell-induced T-cell activation [42, 52]. Previous studies have shown that HIFU ablation systematically affects the secretion of immune anti-tumour factors such as IL-12 and IFN, and increases the number of mature dendritic cells through tumor lysates caused by HIFU ablation, which induces tumour cells apoptosis and intra-tumoural macrophages and lymphocytes infiltration [52, 53]. Joiner et al. indicated that focused ultrasound treatment caused direct tumour damage and altered macrophages and T cells in the tumour microenvironment 2 days after treatment; however, most of these effects will fade after day 15 of focused ultrasound

**Table 5. Recording of pain scores.**

| Case | Before | 2-month | 4-month  | 6-month  | 8-month  | 10-month | 12-month |
|------|--------|---------|----------|----------|----------|----------|----------|
| 1    | 0      | 0       | 3        | Deceased |          |          |          |
| 2    | 0      | 0       | 0        | 0        | 0        | 0        | 0        |
| 3    | 2      | 1       | Deceased |          |          |          |          |
| 4    | 0      | 0       | 0        | 0        | Deceased |          |          |
| 5    | 2      | 2       | 1        | 1        | 0        | 1        | Deceased |
| 6    | 4      | 1       | 1        | 1        | 3        | Deceased |          |
| 7    | 4      | 1       | 2        | 3        | Deceased |          |          |
| 8    | 3      | 1       | 1        | 1        | 0        | 0        | 0        |
| 9    | 2      | 1       | 1        | 0        | 0        | 0        | 0        |
| 10   | 4      | 4       | 5        | 5        | 5        | 5        | 4        |
| 11   | 0      | 0       | 1        | 0        | 0        | 0        | 0        |
| 12   | 0      | 0       | 1        | Deceased | 0        | 0        |          |
| 13   | 0      | 0       | 1        | 1        | 1        | 3        | 3        |
| 14   | 0      | 0       | 0        | 2        | 2        | 4        | 3        |

<https://doi.org/10.1371/journal.pone.0306595.t005>

**Table 6. Assessment of best overall response following HIFU ablation combined with immunotherapy according to RESIST 1.1.**

| Tumor Response      | Patient, No. (%) |
|---------------------|------------------|
| Complete Response   | 0                |
| Partial Response    | 3(21.4%)         |
| Stable Disease      | 8(57.2%)         |
| Disease Progression | 3(21.4%)         |
| Objective Response  | 3(21.4%)         |
| Disease Control     | 11(78.6%)        |

<https://doi.org/10.1371/journal.pone.0306595.t006>

treatment, illustrating the need for combination immunotherapy [54]. Various preclinical laboratory studies and clinical trials have shown that HIFU focused ultrasound enhanced an effective immune responses. The combination with immunotherapy should be more complementary to enhance the effectiveness of anti-tumour therapy [55–59].

This is the first prospective study of HIFU ablation combined with immunotherapy for liver metastases, as far as we know. Throughout the trial, each patient was effectively followed up, with no lost cases and median follow-up time of 9 (range 3–21) months. All metastases have a safe ultrasound pathway and predefined treatment field size and are within the range of

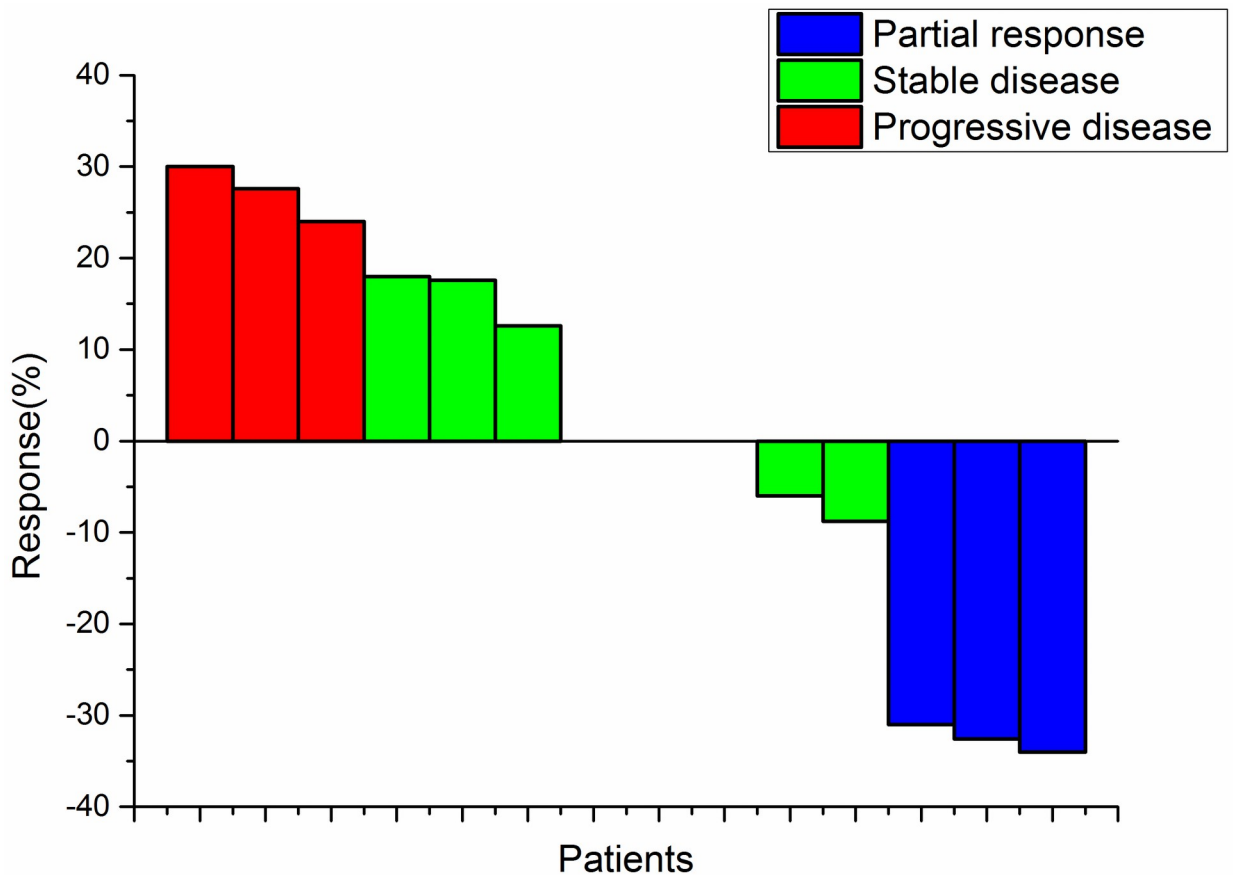

**Fig 4. Waterfall plot for the optimal percentage change in all target lesions.**

<https://doi.org/10.1371/journal.pone.0306595.g004>

lesions treatable with the HIFU technology. The average NPV(Non-Perfusion Volume) ratio was 77% (range: 58–88%), which can be assessed as a relatively satisfactory ablation. With reference to pre-HIFU and post-HIFU QOL scores, there was no reduction in patients' quality of life after HIFU. Immunotherapy within 1 month before and after HIFU ablation was considered a combination of both treatments. Given the absence of literature comparing the efficacy and side effects of different immunological drugs in patients with liver metastases, we refrained from selecting a specific immune checkpoint inhibitor. Combination immunotherapy (anti-PD-1 agents manufactured in China) was chosen for all patients, and most immunotherapy was administered pre-HIFU ablation, with only three patients receiving additional immunotherapy post-HIFU ablation. While there are clinical trials investigating the use of HIFU for immunomodulation of malignant tumors, none have specifically examined the combination of HIFU with immunotherapy [50]. Based on relevant preclinical research, the timing of immunotherapy and HIFU treatment is not rigidly defined [52–54]. The researchers did not find any patients with skin burns during the trial. No major short-or long-term complications occurred. Most AEs (11 of 21) were related to pain in the treatment area, with 3 consisting of pain Grade 2. Other common AEs were fatigue (4 [28.6%]), rash (3 [21.4%]), and 1 case of long-term skin discoloration (Grade 1). Most AEs were found to be reversible. There were an absence of treatment-related deaths and treatment-related grade 4 adverse reactions in this study. Toxicity was manageable. Throughout the trial, patients were expected to survive for more than 3 months (the earliest deaths in Table 5 occurred at approximately 4 months). It is worth noting that the local safety and time to adverse events of HIFU is shorter compared to the systemic safety and time to adverse events of immunotherapy, which occurs approximately six months after immunotherapy [60–62]. Therefore, the number of deaths does not significantly impact the conclusions drawn from our study.

To better reflect the efficacy of HIFU ablation combined with immunotherapy, all target lesions (including measurable primary lesions, hepatic metastases, and remaining metastatic site lesions) were measured by computed tomography (CT) imaging and initial baseline conditions were recorded. For all 14 patients who had at least one post-baseline efficacy assessment, a waterfall plot of the optimal percentage change in all target lesions was plotted. Before the cutoff date, no patients in the trial had achieved complete response (CR) and three patients (21.4%) showed disease progression after 2 cycles of combined therapy. However, eight patients (57.2%) achieved stable disease (SD) and three patients (21.4%) achieved partial response (PR). The objective response rate(ORR) and disease control rate(DCR) were 21.4% and 78.6%, respectively (Table 6). A total of seven patients were still alive after 12 months of follow-up. As of data collected on 1 January 2023, one patient remained in a partial response (PR) state.

The strengths of this study are the ability to realise the needs of the clinicians and the patients, the unique and novel prospective design, the tracking of AE through follow-up, and the detailed workflow records and analysis. There were two limitations of the study. Firstly, patients' long-term survival was not determined. Secondly, T cell infiltration at the HIFU-treated metastatic sites was not evaluated and changes in peripheral blood lymphocyte subsets were not regularly monitored. Therefore, the systemic immune cell changes, tumour microenvironment and long-term survival after HIFU combined with immunotherapy for LM need to be further investigated.

## 5. Conclusions

HIFU ablation combined with immunotherapy relieved tumor-related pain and prevented further local and systemic tumor growth to some extent. Based on these preliminary results, our

prospective study confirms that HIFU combined with immunotherapy is clinically feasible and safe for LM patients. Future research should focus on addressing the limitations of the study, particularly by conducting longitudinal studies to assess the long-term survival outcomes of patients receiving combined HIFU and immunotherapy for LM. Additionally, investigating the immune response dynamics, tumor microenvironment changes, and identifying predictive biomarkers will contribute to optimizing treatment strategies and improving patient outcomes. Comparative studies against standard treatment modalities and optimization of treatment protocols are also essential for enhancing treatment efficacy and minimizing adverse effects in patients with LM.

## Supporting information

### S1 Checklist. TREND statement checklist.

(PDF)

### S1 File.

(DOC)

### S2 File.

(DOCX)

## Author Contributions

**Conceptualization:** Xiaobo Du.

**Data curation:** Xiyue Yang, Yao Liao, Lingli Fan, Binwei Lin, Danfeng Wu, Li Yuan, Jihui Liu.

**Formal analysis:** Binwei Lin.

**Funding acquisition:** Xiaobo Du.

**Investigation:** Xiyue Yang, Yao Liao, Lingli Fan, Binwei Lin, Jie Li, Danfeng Wu, Dongbiao Liao, Li Yuan.

**Methodology:** Xiyue Yang, Yao Liao, Lingli Fan, Binwei Lin, Dongbiao Liao, Jihui Liu.

**Project administration:** Feng Gao, Gang Feng, Xiaobo Du.

**Supervision:** Lingli Fan, Jie Li, Feng Gao, Gang Feng, Xiaobo Du.

**Writing – original draft:** Xiyue Yang, Yao Liao.

**Writing – review & editing:** Xiaobo Du.

## References

1. Gupta GP, Massagué J. Cancer metastasis: building a framework. *Cell*. 2006; 127(4):679–695. <https://doi.org/10.1016/j.cell.2006.11.001> PMID: 17110329
2. McMillan DC, McArdle CS. Epidemiology of colorectal liver metastases. *Surg Oncol*. 2007; 16(1):3–5. <https://doi.org/10.1016/j.suronc.2007.04.008> PMID: 17493802
3. Clark AM, Ma B, Taylor DL, Griffith L, Wells A. Liver metastases: Microenvironments and ex-vivo models. *Exp Biol Med* (Maywood). 2016; 241(15):1639–1652. <https://doi.org/10.1177/1535370216658144> PMID: 27390264
4. Horn SR, Stoltzfus KC, Lehrer EJ, Dawson LA, Tchelebi L, Gusani NJ, et al. Epidemiology of liver metastases. *Cancer Epidemiol*. 2020; 67:101760. <https://doi.org/10.1016/j.canep.2020.101760> PMID: 32562887
5. Liu Z, Suo C, Mao X, Jiang Y, Jin L, Zhang T, et al. Global incidence trends in primary liver cancer by age at diagnosis, sex, region, and etiology, 1990–2017. *Cancer*. 2020; 126(10):2267–2278. <https://doi.org/10.1002/cncr.32789> PMID: 32201944

6. Disibio G, French SW. Metastatic patterns of cancers: results from a large autopsy study. *Arch Pathol Lab Med*. 2008; 132(6):931–939. <https://doi.org/10.5858/2008-132-931-MPOCRF> PMID: 18517275
7. Kouri BE, Funaki BS, Ray CE Jr, Abou-Alfa GK, Burke CT, Darcy MD, et al. ACR Appropriateness Criteria Radiologic Management of Hepatic Malignancy. *J Am Coll Radiol*. 2016; 13(3):265–273. <https://doi.org/10.1016/j.jacr.2015.12.001> PMID: 26944037
8. Akgül Ö, Çetinkaya E, Ersöz Ş, Tez M. Role of surgery in colorectal cancer liver metastases. *World J Gastroenterol*. 2014; 20(20):6113–6122. <https://doi.org/10.3748/wjg.v20.i20.6113> PMID: 24876733
9. Nakagawa T, Okumura N, Ohata K, Igai H, Matsuoka T, Kameyama K. Postrecurrence survival in patients with stage I non-small cell lung cancer. *Eur J Cardiothorac Surg*. 2008; 34(3):499–504. <https://doi.org/10.1016/j.ejcts.2008.05.016> PMID: 18579404
10. Emens LA, Kok M, Ojalvo LS. Targeting the programmed cell death-1 pathway in breast and ovarian cancer. *Curr Opin Obstet Gynecol*. 2016; 28(2):142–147. <https://doi.org/10.1097/GCO.000000000000257> PMID: 26881392
11. Chae YK, Arya A, Iams W, Cruz MR, Chandra S, Choi J, et al. Current landscape and future of dual anti-CTLA4 and PD-1/PD-L1 blockade immunotherapy in cancer; lessons learned from clinical trials with melanoma and non-small cell lung cancer (NSCLC). *J Immunother Cancer*. 2018; 6(1):39. <https://doi.org/10.1186/s40425-018-0349-3> PMID: 29769148
12. La-Beck NM, Jean GW, Huynh C, Alzghari SK, Lowe DB. Immune Checkpoint Inhibitors: New Insights and Current Place in Cancer Therapy. *Pharmacotherapy* vol. 35,10 (2015): 963–76. <https://doi.org/10.1002/phar.1643> PMID: 26497482
13. Balar AV, Galsky MD, Rosenberg JE, Powles T, Petrylak DP, Bellmunt J, et al. Atezolizumab as first-line treatment in cisplatin-ineligible patients with locally advanced and metastatic urothelial carcinoma: a single-arm, multicentre, phase 2 trial. *Lancet (London, England)* vol. 389,10064 (2017): 67–76. [https://doi.org/10.1016/S0140-6736\(16\)32455-2](https://doi.org/10.1016/S0140-6736(16)32455-2) PMID: 27939400
14. Motzer RJ, Escudier B, McDermott DF, George S, Hammers HJ, Srinivas S, et al. Nivolumab versus Everolimus in Advanced Renal-Cell Carcinoma. *N Engl J Med*. 2015; 373(19):1803–1813. <https://doi.org/10.1056/NEJMoa1510665> PMID: 26406148
15. Miao D, Margolis CA, Gao W, Voss MH, Li W, Martini DJ, et al. Genomic correlates of response to immune checkpoint therapies in clear cell renal cell carcinoma. *Science*. 2018; 359(6377):801–806. <https://doi.org/10.1126/science.aan5951> PMID: 29301960
16. Chism DD. Urothelial carcinoma of the bladder and the rise of immunotherapy. *J Natl Compr Cancer Netw*. 2017; 15(10):1277–1284. <https://doi.org/10.6004/jnccn.2017.7036> PMID: 28982752
17. Das R, Verma R, Sznol M, Boddupalli CS, Gettinger SN, Kluger H, et al. Combination therapy with anti-CTLA-4 and anti-PD-1 leads to distinct immunologic changes in vivo. *J Immunol*. 2015; 194(3):950–959. <https://doi.org/10.4049/jimmunol.1401686> PMID: 25539810
18. Chen L, Han X. anti-PD-1/PD-L1 therapy of human cancer: past, present, and future. *J Clin Invest*. 2015; 125(9):3384–3391. <https://doi.org/10.1172/JCI80011> PMID: 26325035
19. Bilen MA, Shabto JM, Martini DJ, Liu Y, Lewis C, Collins H, et al. Sites of metastasis and association with clinical outcome in advanced stage cancer patients treated with immunotherapy. *BMC Cancer*. 2019; 19(1):857. <https://doi.org/10.1186/s12885-019-6073-7> PMID: 31464611
20. Wan PK, Ryan AJ, Seymour LW. Beyond cancer cells: Targeting the tumor microenvironment with gene therapy and armed oncolytic virus. *Mol Ther*. 2021; 29(5):1668–1682. <https://doi.org/10.1016/j.ymthe.2021.04.015> PMID: 33845199
21. Lee JC, Mehdizadeh S, Smith J, Young A, Mufazalov IA, Mowery CT, et al. Regulatory T cell control of systemic immunity and immunotherapy response in liver metastasis. *Sci Immunol*. 2020; 5(52): eaba0759. <https://doi.org/10.1126/sciimmunol.aba0759> PMID: 33008914
22. Yu J, Green MD, Li S, Sun Y, Journey SN, Choi JE, et al. Liver metastasis restrains immunotherapy efficacy via macrophage-mediated T cell elimination. *Nat Med*. 2021; 27(1):152–164. <https://doi.org/10.1038/s41591-020-1131-x> PMID: 33398162
23. Wu RY, Wang BC, Wang K, et al. Immunotherapy and tumor mutational burden in cancer patients with liver metastases: A meta and real word cohort analysis. *Front Oncol*. 2023; 12:994276. <https://doi.org/10.3389/fonc.2022.994276> PMID: 36741738
24. Li S, Sun S, Xiang H, Yang J, Peng M, Gao Q. liver metastases and the efficacy of the PD-1 or PD-L1 inhibitors in cancer: a meta-analysis of randomized controlled trials. *Oncoimmunology*. 2020; 9(1):1746113. <https://doi.org/10.1080/2162402X.2020.1746113> PMID: 32313724
25. Formenti SC, Demaria S. Systemic effects of local radiotherapy. *Lancet Oncol*. 2009; 10(7):718–726. [https://doi.org/10.1016/S1470-2045\(09\)70082-8](https://doi.org/10.1016/S1470-2045(09)70082-8) PMID: 19573801
26. Takeshima T, Chamoto K, Wakita D, Ohkuri T, Togashi Y, Shirato H, et al. Local radiation therapy inhibits tumor growth through the generation of tumor-specific CTL: its potentiation by combination with Th1

- cell therapy. *Cancer Res.* 2010; 70(7):2697–2706. <https://doi.org/10.1158/0008-5472.CAN-09-2982> PMID: 20215523
27. Deng L, Liang H, Burnette B, Beckett M, Darga T, Weichselbaum RR, et al. Irradiation and anti-PD-L1 treatment synergistically promote antitumor immunity in mice. *J Clin Invest.* 2014; 124(2):687–695. <https://doi.org/10.1172/JCI67313> PMID: 24382348
  28. Principe DR, Kamath SD, Korc M, Munshi HG. The immune modifying effects of chemotherapy and advances in chemo-immunotherapy. *Pharmacol Ther.* 2022; 236:108111. <https://doi.org/10.1016/j.pharmthera.2022.108111> PMID: 35016920
  29. Socinski MA, Nishio M, Jotte RM, Cappuzzo F, Orlandi F, Stroyakovskiy D, et al. IMpower150 Final Overall Survival Analyses for Atezolizumab Plus Bevacizumab and Chemotherapy in First-Line Metastatic Nonsquamous NSCLC. *J Thorac Oncol.* 2021; 16(11):1909–1924. <https://doi.org/10.1016/j.jtho.2021.07.009> PMID: 34311108
  30. Kroeze SGC, Pavic M, Stellamans K, Lievens Y, Becherini C, Scorsetti M, et al. Metastases-directed stereotactic body radiotherapy in combination with targeted therapy or immunotherapy: systematic review and consensus recommendations by the EORTC-ESTRO OligoCare consortium. *Lancet Oncol.* 2023; 24(3):e121–e132.31. [https://doi.org/10.1016/S1470-2045\(22\)00752-5](https://doi.org/10.1016/S1470-2045(22)00752-5) PMID: 36858728
  31. Ngwa W, Irabor OC, Schoenfeld JD, Hesser J, Demaria S, Formenti SC. Using immunotherapy to boost the abscopal effect. *Nat Rev Cancer.* 2018; 18(5):313–322. <https://doi.org/10.1038/nrc.2018.6> PMID: 29449659
  32. den Brok MH, Suttmuller RP, van der Voort R, Bennink EJ, Figdor CG, Ruers TJ, et al. In situ tumor ablation creates an antigen source for the generation of antitumor immunity. *Cancer Res.* 2004; 64(11):4024–4029. <https://doi.org/10.1158/0008-5472.CAN-03-3949> PMID: 15173017
  33. Hu Z, Yang XY, Liu Y, Sankin GN, Pua EC, Morse MA, et al. Investigation of HIFU-induced anti-tumor immunity in a murine tumor model. *J Transl Med.* 2007; 5:34. <https://doi.org/10.1186/1479-5876-5-34> PMID: 17625013
  34. Zhang Y, Deng J, Feng J, Wu F. Enhancement of antitumor vaccine in ablated hepatocellular carcinoma by high-intensity focused ultrasound. *World J Gastroenterol.* 2010; 16(28):3584–3591. <https://doi.org/10.3748/wjg.v16.i28.3584> PMID: 20653069
  35. Xia JZ, Xie FL, Ran LF, Xie XP, Fan YM, Wu F. High-intensity focused ultrasound tumor ablation activates autologous tumor-specific cytotoxic T lymphocytes. *Ultrasound Med Biol.* 2012; 38(8):1363–1371. <https://doi.org/10.1016/j.ultrasmedbio.2012.03.009> PMID: 22633269
  36. Silvestrini MT, Ingham ES, Mahakian LM, Kheirulomoom A, Liu Y, Fite BZ, et al. Priming is key to effective incorporation of image-guided thermal ablation into immunotherapy protocols. *JCI Insight.* 2017; 2(6):e90521. <https://doi.org/10.1172/jci.insight.90521> PMID: 28352658
  37. van den Bijgaart RJ, Eikelenboom DC, Hoogenboom M, Fütterer JJ, den Brok MH, Adema GJ. Thermal and mechanical high-intensity focused ultrasound: perspectives on tumor ablation, immune effects and combination strategies. *Cancer Immunol Immunother.* 2017; 66(2):247–258. <https://doi.org/10.1007/s00262-016-1891-9> PMID: 27585790
  38. Kennedy JE. High-intensity focused ultrasound in the treatment of solid tumours. *Nat Rev Cancer.* 2005; 5(4):321–327. <https://doi.org/10.1038/nrc1591> PMID: 15776004
  39. Zhang L, Wang ZB. High-intensity focused ultrasound tumor ablation: review of ten years of clinical experience. *Front Med China.* 2010; 4(3):294–302. <https://doi.org/10.1007/s11684-010-0092-8> PMID: 21191835
  40. Orsi F, Arnone P, Chen W, Zhang L. High intensity focused ultrasound ablation: a new therapeutic option for solid tumors. *J Cancer Res Ther.* 2010; 6(4):414–420. <https://doi.org/10.4103/0973-1482.77064> PMID: 21358073
  41. Merkel LG, Knuttel FM, Deckers R, van Dalen T, Schubert G, Peters NH, et al. First clinical experience with a dedicated MRI-guided high-intensity focused ultrasound system for breast cancer ablation. *Eur Radiol.* 2016; 26(11):4037–4046. <https://doi.org/10.1007/s00330-016-4222-9> PMID: 26852219
  42. van den Bijgaart RJE, Mekers VE, Schuurmans F, Raaijmakers TK, Wassink M, Veltien A, et al. Mechanical high-intensity focused ultrasound creates unique tumor debris enhancing dendritic cell-induced T cell activation. *Front Immunol.* 2022; 13:1038347. <https://doi.org/10.3389/fimmu.2022.1038347> PMID: 36569907
  43. Orsi F, Zhang L, Arnone P, et al. High-intensity focused ultrasound ablation: effective and safe therapy for solid tumors in difficult locations et al. High-intensity focused ultrasound ablation: effective and safe therapy for solid tumors in difficult locations. *AJR Am J Roentgenol.* 2010; 195(3):W245–W252.
  44. Leslie TA, Kennedy JE, Illing RO, Ter Haar GR, Wu F, Phillips RR, et al. High-intensity focused ultrasound ablation of liver tumours: can radiological assessment predict the histological response?. *Br J Radiol.* 2008; 81(967):564–571. <https://doi.org/10.1259/bjr/27118953> PMID: 18559903

45. Park MY, Jung SE, Cho SH, Piao XH, Hahn ST, Han JY, et al. Preliminary experience using high intensity focused ultrasound for treating liver metastasis from colon and stomach cancer. *Int J Hyperthermia*. 2009; 25(3):180–188. <https://doi.org/10.1080/02656730802641949> PMID: 19212862
46. Orgera G, Monfardini L, Della Vigna P, Zhang L, Bonomo G, Arnone P, et al. High-intensity focused ultrasound (HIFU) in patients with solid malignancies: evaluation of feasibility, local tumour response and clinical results. *Radiol Med*. 2011; 116(5):734–748. <https://doi.org/10.1007/s11547-011-0634-4> PMID: 21293939
47. Leslie T, Ritchie R, Illing R, Ter Haar G, Phillips R, Middleton M, et al. High-intensity focused ultrasound treatment of liver tumours: post-treatment MRI correlates well with intra-operative estimates of treatment volume. *Br J Radiol*. 2012; 85(1018):1363–1370. <https://doi.org/10.1259/bjr/56737365> PMID: 22700259
48. Chen L, Wang K, Chen Z, Meng Z, Chen H, Gao H, et al. High intensity focused ultrasound ablation for patients with inoperable liver cancer. *Hepatogastroenterology*. 2015; 62(137):140–143. PMID: 25911884
49. Zhou Q, Zhu XQ, Zhang J, Xu ZL, Lu P, Wu F. Changes in circulating immunosuppressive cytokine levels of cancer patients after high intensity focused ultrasound treatment. *Ultrasound Med Biol*. 2008; 34(1):81–87. <https://doi.org/10.1016/j.ultrasmedbio.2007.07.013> PMID: 17854983
50. Dahan M, Cortet M, Lafon C, Padilla F. Combination of Focused Ultrasound, Immunotherapy, and Chemotherapy: New Perspectives in Breast Cancer Therapy. *J Ultrasound Med*. 2023; 42(3):559–573. <https://doi.org/10.1002/jum.16053> PMID: 35869903
51. Yin L, Li XY, Zhu LL, Chen GL, Xiang Z, Wang QQ, et al. Clinical application status and prospect of the combined anti-tumor strategy of ablation and immunotherapy. *Front Immunol*. 2022; 13:965120. <https://doi.org/10.3389/fimmu.2022.965120> PMID: 36131929
52. Deng J, Zhang Y, Feng J, Wu F. Dendritic cells loaded with ultrasound-ablated tumour induce in vivo specific antitumour immune responses. *Ultrasound Med Biol*. 2010; 36(3):441–448. <https://doi.org/10.1016/j.ultrasmedbio.2009.12.004> PMID: 20172447
53. Chida S, Okada K, Suzuki N, Komori C, Shimada Y. Infiltration by macrophages and lymphocytes in transplantable mouse sarcoma after irradiation with high-intensity focused ultrasound. *Anticancer Res*. 2009; 29(10):3877–3882. PMID: 19846922
54. Joiner JB, Kren NP, Durham PG, McRee AJ, Dayton PA, Pylayeva-Gupta Y. Low-Intensity Focused Ultrasound Produces Immune Response in Pancreatic Cancer. *Ultrasound Med Biol*. 2022; 48(11):2344–2353. <https://doi.org/10.1016/j.ultrasmedbio.2022.06.017> PMID: 36028460
55. Sheybani ND, Witter AR, Thim EA, Yagita H, Bullock TNJ, Price RJ. Combination of thermally ablative focused ultrasound with gemcitabine controls breast cancer via adaptive immunity. *J Immunother Cancer*. 2020; 8(2):e001008. <https://doi.org/10.1136/jitc-2020-001008> PMID: 32819975
56. Bulner S, Prodeus A, Garipey J, Hynynen K, Goertz DE. Enhancing Checkpoint Inhibitor Therapy with Ultrasound Stimulated Microbubbles. *Ultrasound Med Biol*. 2019; 45(2):500–512. <https://doi.org/10.1016/j.ultrasmedbio.2018.10.002> PMID: 30447880
57. Zhang Q, Bao C, Cai X, Jin L, Sun L, Lang Y, et al. Sonodynamic therapy-assisted immunotherapy: A novel modality for cancer treatment. *Cancer Sci*. 2018; 109(5):1330–1345. <https://doi.org/10.1111/cas.13578> PMID: 29575297
58. Bunevicius A, Pikis S, Padilla F, Prada F, Sheehan J. Sonodynamic therapy for gliomas. *J Neurooncol*. 2022; 156(1):1–10. <https://doi.org/10.1007/s11060-021-03807-6> PMID: 34251601
59. Yue W, Chen L, Yu L, Zhou B, Yin H, Ren W, et al. Checkpoint blockade and nanosensitizer-augmented noninvasive sonodynamic therapy combination reduces tumour growth and metastases in mice. *Nat Commun*. 2019; 10(1):2025. <https://doi.org/10.1038/s41467-019-09760-3> PMID: 31048681
60. Martins F, Sofiya L, Sykietis GP, et al. Adverse effects of immune-checkpoint inhibitors: epidemiology, management and surveillance. *Nat Rev Clin Oncol*. 2019; 16(9):563–580. <https://doi.org/10.1038/s41571-019-0218-0> PMID: 31092901
61. Elia G, Ferrari SM, Galdiero MR, et al. New insight in endocrine-related adverse events associated to immune checkpoint blockade. *Best Pract Res Clin Endocrinol Metab*. 2020; 34(1):101370. <https://doi.org/10.1016/j.beem.2019.101370> PMID: 31983543
62. Cortellini A, Buti S, Agostinelli V, Bersanelli M. A systematic review on the emerging association between the occurrence of immune-related adverse events and clinical outcomes with checkpoint inhibitors in advanced cancer patients. *Semin Oncol*. 2019; 46(4–5):362–371. <https://doi.org/10.1053/j.seminoncol.2019.10.003> PMID: 31727344
